# Supplementary material for: Timing, delays and pathways to diagnosis of endometriosis: a scoping review protocol
Source: PubMed Central journal article supplement — BMJ Open. 2021 Jun 24;11(6):e049390. doi: 10.1136/bmjopen-2021-049390 (PMC8231065; doi:10.1136/bmjopen-2021-049390), 2021-06-24
Supplement: bmjopen-2021-049390.draft_revisions.pdf [file bmjopen-2021-049390.draft_revisions.pdf]

# BMJ Open

BMJ Open is committed to open peer review. As part of this commitment we make the peer review history of every article we publish publicly available.

When an article is published we post the peer reviewers' comments and the authors' responses online. We also post the versions of the paper that were used during peer review. These are the versions that the peer review comments apply to.

The versions of the paper that follow are the versions that were submitted during the peer review process. They are not the versions of record or the final published versions. They should not be cited or distributed as the published version of this manuscript.

BMJ Open is an open access journal and the full, final, typeset and author-corrected version of record of the manuscript is available on our site with no access controls, subscription charges or pay-per-view fees (<http://bmjopen.bmj.com>).

If you have any questions on BMJ Open's open peer review process please email [info.bmjopen@bmj.com](mailto:info.bmjopen@bmj.com)

# BMJ Open

## Timing, Delays and Pathways to Diagnosis of Endometriosis: A Scoping Review Protocol

|                               |                                                                                                                                                                                                                                                                                                                                                                                                                                                                                                                                                                                                              |
|-------------------------------|--------------------------------------------------------------------------------------------------------------------------------------------------------------------------------------------------------------------------------------------------------------------------------------------------------------------------------------------------------------------------------------------------------------------------------------------------------------------------------------------------------------------------------------------------------------------------------------------------------------|
| Journal:                      | <i>BMJ Open</i>                                                                                                                                                                                                                                                                                                                                                                                                                                                                                                                                                                                              |
| Manuscript ID                 | bmjopen-2021-049390                                                                                                                                                                                                                                                                                                                                                                                                                                                                                                                                                                                          |
| Article Type:                 | Protocol                                                                                                                                                                                                                                                                                                                                                                                                                                                                                                                                                                                                     |
| Date Submitted by the Author: | 31-Jan-2021                                                                                                                                                                                                                                                                                                                                                                                                                                                                                                                                                                                                  |
| Complete List of Authors:     | Cromeens, Martha Grace; University of North Carolina at Chapel Hill Graduate School, School of Nursing<br>Carey, Erin; University of North Carolina at Chapel Hill School of Medicine, Department of Obstetrics and Gynecology<br>Robinson, W. R.; University of North Carolina at Chapel Hill Gillings School of Global Public Health, Department of Epidemiology; University of North Carolina at Chapel Hill Carolina Population Center<br>Knafl, Kathleen; University of North Carolina at Chapel Hill, School of Nursing<br>Thoyre , SM; University of North Carolina at Chapel Hill, School of Nursing |
| Keywords:                     | GYNAECOLOGY, International health services < HEALTH SERVICES ADMINISTRATION & MANAGEMENT, Protocols & guidelines < HEALTH SERVICES ADMINISTRATION & MANAGEMENT, REPRODUCTIVE MEDICINE, Minimally invasive surgery < GYNAECOLOGY, Reproductive medicine < GYNAECOLOGY                                                                                                                                                                                                                                                                                                                                         |
|                               |                                                                                                                                                                                                                                                                                                                                                                                                                                                                                                                                                                                                              |

SCHOLARONE™  
Manuscripts

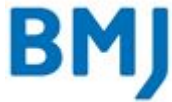

I, the Submitting Author has the right to grant and does grant on behalf of all authors of the Work (as defined in the below author licence), an exclusive licence and/or a non-exclusive licence for contributions from authors who are: i) UK Crown employees; ii) where BMJ has agreed a CC-BY licence shall apply, and/or iii) in accordance with the terms applicable for US Federal Government officers or employees acting as part of their official duties; on a worldwide, perpetual, irrevocable, royalty-free basis to BMJ Publishing Group Ltd ("BMJ") its licensees and where the relevant Journal is co-owned by BMJ to the co-owners of the Journal, to publish the Work in this journal and any other BMJ products and to exploit all rights, as set out in our [licence](#).

The Submitting Author accepts and understands that any supply made under these terms is made by BMJ to the Submitting Author unless you are acting as an employee on behalf of your employer or a postgraduate student of an affiliated institution which is paying any applicable article publishing charge ("APC") for Open Access articles. Where the Submitting Author wishes to make the Work available on an Open Access basis (and intends to pay the relevant APC), the terms of reuse of such Open Access shall be governed by a Creative Commons licence – details of these licences and which [Creative Commons](#) licence will apply to this Work are set out in our licence referred to above.

Other than as permitted in any relevant BMJ Author's Self Archiving Policies, I confirm this Work has not been accepted for publication elsewhere, is not being considered for publication elsewhere and does not duplicate material already published. I confirm all authors consent to publication of this Work and authorise the granting of this licence.

## ENDOMETRIOSIS SCOPING REVIEW PROTOCOL

1

**Timing, Delays and Pathways to Diagnosis of Endometriosis: A Scoping Review Protocol**

Authors: Martha Grace Cromeens, JD, BSN, RN<sup>1</sup>  
 Erin T. Carey, MD, MSCR<sup>2</sup>  
 W.R. Robinson, PhD, MSPH<sup>3,4</sup>  
 Kathleen Knafl, PhD, FAAN<sup>1</sup>  
 S.M. Thoyre, PhD, RN, FAAN<sup>1</sup>

<sup>1</sup>School of Nursing, University of North Carolina, Chapel Hill, NC, USA

<sup>2</sup>Department of Obstetrics and Gynecology, University of North Carolina, Chapel Hill, NC, USA

<sup>3</sup>Department of Epidemiology, Gillings School of Global Public Health, University of North Carolina at Chapel Hill, Chapel Hill, NC, USA

<sup>4</sup>Carolina Population Center, University of North Carolina, Chapel Hill, NC, USA

Corresponding Author:

Martha Grace Cromeens,  
 Carrington Hall, Campus Box #7460,  
 Chapel Hill, NC 27599-7460  
 cromeens@email.unc.edu

Conflict of Interest Statement: No conflict of interest has been declared by the authors

Author contributions

| Criteria                                                                                                                                                                                  | Author Initials     |
|-------------------------------------------------------------------------------------------------------------------------------------------------------------------------------------------|---------------------|
| Made substantial contributions to conception and design, or acquisition of data, or analysis and interpretation of data;                                                                  | MGC, EC, WR, KK, ST |
| Involved in drafting the manuscript or revising it critically for important intellectual content;                                                                                         | MGC, EC, WR, KK, ST |
| Given final approval of the version to be published. Each author should have participated sufficiently in the work to take public responsibility for appropriate portions of the content; | MGC, EC, WR, KK, ST |
| Agreed to be accountable for all aspects of the work in ensuring that questions related to the accuracy or integrity of any part of the work are appropriately investigated and resolved. | MGC, EC, WR, KK, ST |

## Abstract

### Introduction

Pathways to diagnosis for women with endometriosis are frequently characterized with delays. Internationally, women face significant barriers and times to diagnosis. The prolonged time without a diagnosis may result in treatment delay, with clinical implications of chronic pain and an unknown effect on fertility outcomes. As delays in diagnosis extend, those suffering from endometriosis incur more cost and frequently experience a reduction in quality of life. Endometriosis research would benefit from mapping the current scientific literature on pathways, timing, and delays of diagnosis of endometriosis in order to define common concepts and identify gaps in the science for future examination and intervention development.

### Methods & analysis

This protocol outlines a scoping review to investigate the current research focused on pathways, timing and delays in endometriosis diagnosis. The scoping review utilizes the Joanna Briggs Institute Methodology. The researchers applied the Population, Concept, Context (PCC) approach to form the research questions. A search string of key terms and Medical Subject Headings (MeSH) will be used to systematically search the PubMed, CINAHL, EMBASE, Web of Science, and Cochrane databases. We will also search ClinicalTrials.gov and grey literature sources. The original search was performed in July 2020, and it will be rerun prior to manuscript submission. Finally, the reference lists of included works will be reviewed for additional studies. The search results will be screened and reviewed according to predetermined inclusion and exclusion criteria. Data will be extracted from the studies identified for final inclusion using a predetermined tool. The resulting data will be analyzed to report the state of the science.

### Ethics and dissemination

The proposed scoping review does not require review or approval by an ethical board. The researchers will disseminate the study results via conference presentations and publication in a peer-reviewed journal.

### Strengths and limitations of this study

- This protocol proposes a systematic scoping review of current literature and research on the pathways, timing, and delays of the diagnosis of endometriosis.
- The Joanna Briggs Institute Methodology and recommended Population, Concept, Context (PCC) method for research question formation is the scaffold on which this protocol builds a systematic approach.
- This review excludes non-English language studies.
- The proposed scoping review offers an effective and comprehensive means to identify gaps for future research into pathways, timing, and delays of diagnosis of endometriosis.

## Introduction

Endometriosis, a gynecologic condition characterized by endometrial stroma and gland like lesions outside of the uterus, has variable clinical presentations.<sup>1-3</sup> The lesions themselves may be limited to superficial implants, cysts inside the ovary, deep infiltrating disease into the surrounding tissue or pelvic organs or a combination. Similarly, clinical symptoms are also varied, ranging from women who experience no pain, to those with dysmenorrhea, dyspareunia, dyschezia, or those with a complex pelvic pain presentation with multiple pain complaints.<sup>4</sup> Although health care providers make provisional diagnoses based on symptoms and treatment response, surgical evaluation with adjunct histologic review remains the gold standard of diagnosis.<sup>1,5</sup> This significant barrier compounds on other obstacles to diagnosis including patient-, provider-, and health system-centered influences. As a result, women and adolescents with endometriosis internationally experience delays and extended times to diagnosis.

Delays in diagnosis have potentially harmful effects. Women with prolonged times to diagnosis may delay treatment and experience increased pain over time. This pain sensitization occurs through persistent nociceptive and inflammatory pain signals from within the endometriotic lesions.<sup>6</sup> Over time, women with endometriosis-associated pain may experience alterations in their peripheral and central nervous system pain processing, increasing risk for chronic pelvic pain and abnormal pain referral patterns.<sup>6-10</sup> The impact of delayed diagnosis and infertility should also not be overlooked. Endometriosis is known to decrease fertility by several mechanisms: structurally with adhesions and fallopian tube blockage as well as underlying immunologic, endocrine, endometrial cavity and ovarian reserve abnormalities.<sup>11</sup> While medical treatment of disease appears to be low-yield in fertility outcomes, some surgical interventions may improve fertility outcomes.<sup>12</sup>

At the same time, women with endometriosis incur significant costs in the form of lost work productivity and healthcare expenses. Prolonging the search for a diagnosis and delaying treatment

## ENDOMETRIOSIS SCOPING REVIEW PROTOCOL

4

1  
2  
3 may mean extended times of compounding financial losses. Multiple studies have found women  
4 report lost work productivity (absenteeism and presenteeism) when symptomatic with averages  
5 ranging between roughly one and more than ten hours in a week.<sup>13-15</sup> Further, women with  
6 endometriosis incur significant costs, both direct (e.g., emergency department visits, hospitalizations,  
7 surgeries and treatments)<sup>16-18</sup> and indirect (e.g., work absenteeism, short- and long-term  
8 disability).<sup>13,15-18</sup> One study found that patients with endometriosis incurred more than three times  
9 the mean annual total adjusted direct costs of their control counterparts.<sup>17</sup> These financial burdens  
10 likely mount as they seek a diagnosis.

21 Despite what is known about the physical and financial burdens of endometriosis, the  
22 systematic reviews on timing, delay, and influencing factors on pathways to diagnosis are limited. In  
23 2015, a systematic review of qualitative research on women's experiences with endometriosis was  
24 reported.<sup>19</sup> Diagnosis delay was the most common theme, revealed in 10 of the 18 studies  
25 reviewed.<sup>19</sup> The study outlined major findings concerning delays in the studies but did not define the  
26 concept of diagnosis delay. Furthermore, this review solely considered qualitative studies, limiting  
27 the overall research landscape of diagnosis delay data.<sup>19</sup> Two years later, Soliman, Fuldeore, and  
28 Snabes conducted a quantitative study analyzing factors associated with the time to diagnosis<sup>20</sup>  
29 including a table of 16 studies reporting diagnostic delays. Delays in diagnosis were reported in time  
30 and did not provide further analysis of the concepts or literature. Recently, a systematic review of  
31 diagnostic delay for women with endometriosis was registered with PROSPERO in April 2020.<sup>21</sup>  
32 The registration indicates the study will only analyze quantitative studies and will focus on the  
33 duration of diagnostic delay.

50 While these resources represent the reviews and summaries of studies on timing, delay, or  
51 pathways to diagnosis of endometriosis, there is no systematic scoping review of the literature on  
52 these topics. A systematic scoping review is well suited for the broad objectives of this study,  
53  
54  
55

1  
2  
3 designed to map concepts and identify knowledge gaps.<sup>22</sup> A scoping review methodology is ideal in  
4  
5 searching across research designs (e.g., quantitative, qualitative, mixed-methods) to determine the  
6  
7 range of evidence.<sup>22</sup> Scoping reviews do not analyze the studies or synthesize points of data from  
8  
9 multiple works to make recommendations for practice.<sup>22,23</sup> Instead, scoping reviews map the existing  
10  
11 scientific research to identify gaps in the research and make recommendations for future  
12  
13 investigation.<sup>22</sup>  
14  
15

16  
17 The information assembled from the scoping review will support the development of a  
18  
19 uniform language and identify necessary directions for future endometriosis research and  
20  
21 interventions. This protocol proposes a systematic scoping review to map the state of the  
22  
23 international scientific research on pathways, timing, and delays of diagnosis of endometriosis to  
24  
25 identify gaps for future investigation across methodologies.  
26  
27

## 28 **Rationale**

29  
30 Delays in diagnosis for women with endometriosis may result in compounding financial,  
31  
32 emotional, and physical burdens for the women and their communities. Although a recognized  
33  
34 problem internationally, there have been no scoping reviews detailing how this phenomenon has  
35  
36 been studied. A scoping review of the pathways, timing, and delays in diagnosis of endometriosis  
37  
38 will map the existing research, define key concepts, and identify gaps for future research.  
39  
40

## 41 **Objectives**

42  
43 The authors describe a protocol for a systematic scoping review with the primary objective  
44  
45 to map current international scientific peer-reviewed and gray literature investigating pathways,  
46  
47 timing, and delay of diagnosis of endometriosis for women. The results of this review will guide  
48  
49 recommendations for future research.  
50  
51

## 52 **Methods and Analysis**



This review will follow the Joanna Briggs Institute (JBI) guidelines for scoping reviews.<sup>22,23</sup>

Accordingly, an *a priori* scoping review protocol was developed prior to execution.<sup>22,23</sup> Results of the scoping review will be reported consistent with the Scoping review extension of the Preferred Reporting Items for Systematic Reviews (PRISMA-ScR) checklist.<sup>24</sup> This scoping review will not require patient or public involvement. Patients and the public were not involved in the design, or conduct, or reporting, or dissemination plans of this protocol. An overview of the procedure discussed in the protocol is presented in Figure 1.

### Scoping review questions

The research questions for this scoping review were formed by applying the Population—Concept—Context (PCC) framework (see Table 1) to achieve the primary objective described above.<sup>22</sup>

**Table 1**

*Population—Concept—Context*

|            |                                                                                                                                                                                                                                                                                                                                                                                           |
|------------|-------------------------------------------------------------------------------------------------------------------------------------------------------------------------------------------------------------------------------------------------------------------------------------------------------------------------------------------------------------------------------------------|
| Population | All peer-reviewed and gray literature including people with endometriosis across all age groups.                                                                                                                                                                                                                                                                                          |
| Concepts   | Literature reporting research on pathways, timing, or delay in diagnosis of endometriosis will be included in the review. The concept of “pathways” includes research on influencing factors leading to a diagnosis such as the first provider consulted, specialty of providers, numbers of providers, and numbers of emergency room visits as they relate to timing/delay of diagnosis. |
| Context    | The context is international. The location, time frame, and environment will not be limited. The language of the articles was limited to English.                                                                                                                                                                                                                                         |

This led to the primary question: What research has been performed internationally (context) concerning the pathways, timing, and delays in diagnosis of endometriosis (concept) for people across all age groups (population)? Secondary review questions were identified to further understanding of the defined PCC and answer the primary question. The primary and secondary review questions can be seen in Figure 2.

### Search strategy process

## ENDOMETRIOSIS SCOPING REVIEW PROTOCOL

7

The search strategy will utilize the three-step process recommended by JBI.<sup>22</sup> First, we performed initial searches in PubMed and CINAHL to develop a preliminary list of search terms in the titles, abstracts, and index terms of the resulting articles. The information gained from the initial search was used to develop a more comprehensive search strategy based on the PCC framework. The list of root terms and a sample search string can be seen in Table 2. Variants of the terms identified in Table 2 were refined to create a final search strategy with search phrases and MeSH terms. A research librarian was consulted in the development of the final search strategy. The term “pathway” and its variants were excluded from the search string because they drew results focused on genetic testing. However, studies focused on pathways to diagnosis in relationship to timing or delay were captured using the terms in Table 2. Second, the search strategy was reviewed by the team members and then translated for each database being searched. The finalized search strings were used to search six databases (see below). Third, the reference lists of the included articles (determined in the screening process discussed below) were searched for additional studies with the key terms in mind.

**Table 2***Search terms*

| Search terms                                                                                                                                                                                                                                                                                                                                                                                                                           | MeSH terms                                                                                                             |
|----------------------------------------------------------------------------------------------------------------------------------------------------------------------------------------------------------------------------------------------------------------------------------------------------------------------------------------------------------------------------------------------------------------------------------------|------------------------------------------------------------------------------------------------------------------------|
| <ul style="list-style-type: none"> <li>• Diagnosis</li> <li>• Delayed diagnosis</li> <li>• Late diagnosis</li> <li>• Time</li> <li>• Delay</li> <li>• Endometriosis</li> </ul>                                                                                                                                                                                                                                                         | <ul style="list-style-type: none"> <li>• Delayed Diagnosis</li> <li>• Time factors</li> <li>• Endometriosis</li> </ul> |
| Sample Search String: PubMed                                                                                                                                                                                                                                                                                                                                                                                                           |                                                                                                                        |
| (((("Delayed Diagnosis"[Mesh] OR "Delayed Diagnosis"[tiab] OR "Delayed Diagnoses"[tiab] OR "Late Diagnosis"[tiab] OR "late diagnoses"[tiab] OR ((diagnosis[sh] OR diagnosis[tiab] OR diagnosed[tiab] OR diagnosing[tiab] OR diagnoses[tiab]) AND ("time factors"[mesh] OR delay[tiab] OR delayed[tiab] OR delays[tiab] OR delaying[tiab]))) AND ((endometriosis[mesh] OR endometriosis[tiab] OR Endometrioses[tiab])) Filters: English |                                                                                                                        |

**Information sources**

Five databases—PubMed, CINAHL, EMBASE, Web of Science, and Cochrane—were searched on 1 July 2020. The search did not apply date limits, but excluded non-English language articles. We also searched ClinicalTrials.gov for registered clinical studies focused on pathways, timing, or delays in diagnosis of endometriosis. The search will be repeated prior to the submission of the scoping review results for publication (expected in March 2021).

### Eligibility criteria

The eligibility criteria were built on the PCC framework to answer the research questions. The inclusion and exclusion criteria are outlined in Table 3.

**Table 3**

*Inclusion and Exclusion criteria*

| Inclusion criteria                                                                                                                                                                                                                                                                                                                                                                                                                                                                                                                                                                                                                                                                  | Exclusion criteria                                                                                                                                                                                                                                                                                                                                                                                                                                 |
|-------------------------------------------------------------------------------------------------------------------------------------------------------------------------------------------------------------------------------------------------------------------------------------------------------------------------------------------------------------------------------------------------------------------------------------------------------------------------------------------------------------------------------------------------------------------------------------------------------------------------------------------------------------------------------------|----------------------------------------------------------------------------------------------------------------------------------------------------------------------------------------------------------------------------------------------------------------------------------------------------------------------------------------------------------------------------------------------------------------------------------------------------|
| <ul style="list-style-type: none"> <li>• Studies with participants of any age, race/ethnicity, nationality, socioeconomic status, or language</li> <li>• Study participants identified as having endometriosis (i.e., surgical verification, histological confirmation, provider presumed, or participant identified)</li> <li>• The purpose and/or results of the study report issues related to pathways, timing, and/or delay in diagnosis</li> <li>• Primary research/empirical studies (qualitative, quantitative, mixed-methods, and intervention studies)</li> <li>• Peer-reviewed journals</li> <li>• Gray sources (e.g., dissertations)</li> <li>• Case studies</li> </ul> | <ul style="list-style-type: none"> <li>• Animal studies</li> <li>• Abstracts only</li> <li>• Editorials, Op-eds, or position papers</li> <li>• Literature reviews</li> <li>• Case reports</li> <li>• Pathways, timing, or delays in diagnosis are reported solely as a descriptive statistic of the sample.</li> <li>• Full-text is not published in English</li> <li>• Studies concentrating on diagnostic tools, tests, or equipment.</li> </ul> |

### Abstract and full-text screening

The literature search from all included databases will be uploaded to Endnote, where duplicates will be removed. The remaining results will be imported into Covidence<sup>25</sup> for the screening process. Covidence also removes duplicates. For the initial screening, two researchers will independently review the titles and abstracts for inclusion. The two screeners will perform the initial

1  
2  
3 screening for 10% of the records by applying the inclusion and exclusion criteria. Following the  
4  
5 screening, they will review conflicting decisions to develop a common understanding of the  
6  
7 inclusion/exclusion criteria and improve agreement. Revisions may be made to the inclusion and  
8  
9 exclusion criteria through this process. After reviewing 50% of the cases, a second meeting will be  
10  
11 scheduled to resolve conflicts, then proceed with the remaining records. Finally, a third researcher  
12  
13 will independently “tie-break” any unresolved conflicts.  
14  
15

16  
17 After completion of the record review, the same two screeners will perform the full-text  
18  
19 screening of the records that passed the initial abstract screening. Again, the two screeners will  
20  
21 review 10% of the articles for inclusion, and then meet to resolve conflicts and refine their  
22  
23 application of the inclusion/exclusion criteria. In cases of record disagreement, a third researcher  
24  
25 will resolve conflicts. The same process will repeat for the first 50% of the records, and again for the  
26  
27 final 50% of the cases. The cases that make it through the full-text review will comprise the sample  
28  
29 for data extraction and references from included articles will be reviewed to identify additional  
30  
31 potential articles. If any articles are chosen from the reference lists, they will be added to Covidence  
32  
33 and they will undergo the process of abstract and full-text screening.  
34  
35

### 36 37 **Data extraction and charting**

38  
39 A preliminary data extraction tool was created based on the objective, PCC framework, and  
40  
41 resulting research questions. Four researchers will perform an initial review of articles. As a group,  
42  
43 they will edit and refine the initial extraction tool to better meet the study objective and review  
44  
45 questions.<sup>23</sup> The data extraction fields will be chosen to further explore population, concept, and  
46  
47 context. Possible data extraction categories for each can be seen in Table 4. The final sample of  
48  
49 articles will be divided equally among the reviewers, with two researchers reviewing each article: the  
50  
51 primary author and an additional reviewer. The extraction tool will be used to collect and chart data.  
52  
53 The two reviewers will meet to resolve conflicts, hone their shared understanding of the extraction  
54  
55  
56  
57  
58  
59  
60

method, and refine the extraction tool when needed. A third researcher will resolve unreconciled conflicts.

**Table 4**

*Extraction categories*

| Population                                                                                                                                                                                                                                                          | Concept                                                                                                                                                                                                                                                               | Context                                                                                                                                                                                                        |
|---------------------------------------------------------------------------------------------------------------------------------------------------------------------------------------------------------------------------------------------------------------------|-----------------------------------------------------------------------------------------------------------------------------------------------------------------------------------------------------------------------------------------------------------------------|----------------------------------------------------------------------------------------------------------------------------------------------------------------------------------------------------------------|
| <ul style="list-style-type: none"> <li>• Sample size</li> <li>• Means of diagnosis of endometriosis</li> <li>• Race/ethnicity</li> <li>• Socioeconomic status (proxies reported)</li> <li>• Demographics reported</li> <li>• Health descriptors reported</li> </ul> | <ul style="list-style-type: none"> <li>• Definition of pathway, timing, or delay</li> <li>• Means of calculation</li> <li>• Factors investigated in relationship to pathway, timing, or delay</li> <li>• Impacts of delay and diagnosis on patients' lives</li> </ul> | <ul style="list-style-type: none"> <li>• Geographic origin of study</li> <li>• Recruitment setting</li> <li>• Recruitment means</li> <li>• Data collection setting</li> <li>• Data collection means</li> </ul> |

### Data analysis and synthesis of results

The results of the search strategy and the screening process will be reported consistent with the PRISMA-ScR recommended method with a flow diagram and corresponding narrative description.<sup>24</sup> The researchers will report the synthesis of the data from the extraction tool for the PCC categories (Table 4). The results will be reported to answer the primary objective and research questions (Figure 2).

### Ethics and dissemination

Approval from the research ethics boards of the University of North Carolina at Chapel Hill is not required for this scoping review. The scoping review did not require patient or public involvement, limiting ethical and safety considerations. The results of this scoping review will be disseminated through academic, clinical, and public venues. The researchers will seek publication for the results in peer-reviewed journals, and present the review findings at conferences. The researchers also intend to form recommendations for areas of future research.

One limitation of this review is the language restriction. The researchers limited inclusion to articles published in English. Articles that had an English abstract, but non-English body were

## ENDOMETRIOSIS SCOPING REVIEW PROTOCOL

1

1  
2  
3 excluded. Endometriosis and delays in diagnosis of endometriosis are challenges experienced and  
4 researched globally. The science would benefit from a scoping review inclusive of other languages.  
5  
6

**Conclusion**

7  
8  
9  
10 The common phenomenon of prolonged average times to diagnosis represents one of the  
11 most challenging aspects of endometriosis for the patients and their healthcare providers. The  
12 scoping review of delay, timing, and pathways to diagnosis described in this protocol will survey the  
13 current scientific literature to identify gaps in the research across methods to encourage uniformity  
14 of terms and prevent duplication of efforts. International consensus on definitions and concepts  
15 while recognizing past research approaches to understand influencing factors, relationships, and  
16 impacts of delays in diagnosis of endometriosis will lead to more efficient research, targeted  
17 interventions, and ultimately improved outcomes for patients.  
18  
19  
20  
21  
22  
23  
24  
25  
26  
27

**Figure legend**

28  
29  
30 Figure 1. Scoping Review Procedure

31  
32 Figure 2. Scoping Review Research Questions  
33

**Authors' contributions**

34  
35 All five authors contributed to the design, search strategy, and writing of the scoping review  
36 protocol.  
37  
38  
39  
40

**Competing interests statement**

41  
42 The authors have no competing interests to declare.  
43  
44  
45  
46  
47  
48  
49

**Funding Statement**

50  
51  
52 Funding Statement: This research is supported by the National Institute of Nursing Research of the  
53 National Institutes of Health under award number F31NR018786 (Cromeens, PI), a UNC  
54  
55  
56  
57  
58  
59

## ENDOMETRIOSIS SCOPING REVIEW PROTOCOL

1

1  
2  
3 Dissertation Completion Fellowship, and a 2018 Sigma Small Grant by Sigma Theta Tau  
4  
5 International (STTI #19-2191). Ms. Cromeens is also a Virginia Kelley Scholar of the American  
6  
7 Nurses Foundation (ANF 10055), a Linda Waring Matthews Research Scholar, 2019-2020, and a  
8  
9 Hillman Scholar in Nursing Innovation at the School of Nursing at the University of North Carolina  
10  
11 at Chapel Hill. This study also received funding from the Hillman Scholars Program in Nursing  
12  
13 Innovation through the “Interdisciplinary Inquiry” and the “Advancing Early Research  
14  
15 Opportunities” grants. Dr. Robinson’s research, “Racial differences in treatment with hysterectomy:  
16  
17 A multilevel investigation,” is supported by the National Institute on Minority Health and Health  
18  
19 Disparities of the National Institutes of Health under award number R01MD011680 (Robinson, PI).  
20  
21  
22  
23  
24  
25  
26  
27  
28  
29  
30  
31  
32  
33  
34  
35  
36  
37  
38  
39  
40  
41  
42  
43  
44  
45  
46  
47  
48  
49  
50  
51  
52  
53  
54  
55  
56  
57  
58  
59  
60

## References

1. Giudice LC, Kao LC. Endometriosis. *Lancet (London, England)*. 2004;364(9447):1789-1799.
2. Zondervan KT, Becker CM, Missmer SA. Endometriosis. *N Engl J Med*. 2020;382(13):1244-1256.
3. Zondervan KT, Becker CM, Koga K, Missmer SA, Taylor RN, Viganò P. Endometriosis. *Nat Rev Dis Primers*. 2018;4(1):9.
4. Vercellini P, Viganò P, Somigliana E, Fedele L. Endometriosis: pathogenesis and treatment. *Nature Reviews Endocrinology*. 2014;10(5):261-275.
5. Kinkel K, Brosens J, Brosens I. Preoperative Investigations. In: Sutton C, Jones K, Adamson GD, eds. *Modern Management of Endometriosis*. London, England: Taylor and Francis Group; 2006:71-85.
6. Stratton P, Berkley KJ. Chronic pelvic pain and endometriosis: translational evidence of the relationship and implications. *Human reproduction update*. 2011;17(3):327-346.
7. Aredo JV, Heyrana KJ, Karp BI, Shah JP, Stratton P. Relating Chronic Pelvic Pain and Endometriosis to Signs of Sensitization and Myofascial Pain and Dysfunction. *Seminars in reproductive medicine*. 2017;35(1):88-97.
8. Bajaj P, Bajaj P, Madsen H, Arendt-Nielsen L. Endometriosis is associated with central sensitization: a psychophysical controlled study. *The journal of pain : official journal of the American Pain Society*. 2003;4(7):372-380.
9. Vuontisjarvi S, Rossi HR, Herrala S, et al. The Long-Term Footprint of Endometriosis: Population-Based Cohort Analysis Reveals Increased Pain Symptoms and Decreased Pain Tolerance at Age 46 Years. *The journal of pain : official journal of the American Pain Society*. 2018;19(7):754-763.
10. Morotti M, Vincent K, Becker CM. Mechanisms of pain in endometriosis. *European journal of obstetrics, gynecology, and reproductive biology*. 2017;209:8-13.
11. Practice Committee of the American Society for Reproductive Medicine. Endometriosis and infertility: a committee opinion. *Fertility and sterility*. 2012;98(3):591-598.
12. Lee D, Kim SK, Lee JR, Jee BC. Management of endometriosis-related infertility: Considerations and treatment options. *Clin Exp Reprod Med*. 2020;47(1):1-11.
13. Fourquet J, Baez L, Figueroa M, Iriarte RI, Flores I. Quantification of the impact of endometriosis symptoms on health-related quality of life and work productivity. *Fertility and sterility*. 2011;96(1):107-112.
14. Nnoaham KE, Hummelshoj L, Webster P, et al. Impact of endometriosis on quality of life and work productivity: a multicenter study across ten countries. *Fertility and sterility*. 2011;96(2):366-373.e368.
15. Soliman AM, Coyne KS, Gries KS, Castelli-Haley J, Snabes MC, Surrey ES. The Effect of Endometriosis Symptoms on Absenteeism and Presenteeism in the Workplace and at Home. *Journal of managed care & specialty pharmacy*. 2017;23(7):745-754.
16. Gao X, Outley J, Botteman M, Spalding J, Simon JA, Pashos CL. Economic burden of endometriosis. *Fertility and sterility*. 2006;86(6):1561-1572.



## ENDOMETRIOSIS SCOPING REVIEW PROTOCOL

1.

17. Soliman AM, Surrey E, Bonafede M, Nelson JK, Castelli-Haley J. Real-World Evaluation of Direct and Indirect Economic Burden Among Endometriosis Patients in the United States. *Advances in therapy*. 2018;35(3):408-423.
18. Soliman AM, Taylor HS, Bonafede M, Nelson JK, Castelli-Haley J. Incremental direct and indirect cost burden attributed to endometriosis surgeries in the United States. *Fertility and sterility*. 2017;107(5):1181-1190.e1182.
19. Young K, Fisher J, Kirkman M. Women's experiences of endometriosis: a systematic review and synthesis of qualitative research. *The journal of family planning and reproductive health care*. 2015;41(3):225-234.
20. Soliman AM, Fuldeore M, Snabes MC. Factors Associated with Time to Endometriosis Diagnosis in the United States. *Journal of women's health (2002)*. 2017;26(7):788-797.
21. Illum LRH, Rytter D, Forman A, Ostergaard LH, Melgaard A, de Thurah A. A systematic review of the diagnostic delay for women with endometriosis. In: PROSPERO 2020 CRD420201602242020.
22. Peters MD, Godfrey CM, Khalil H, McInerney P, Parker D, Soares CB. Guidance for conducting systematic scoping reviews. *Int J Evid Based Healthc*. 2015;13(3):141-146.
23. Peters MDJ, Godfrey CM, McInerney P, Munn Z, Tricco AC, Khalil H. Chapter 11: Scoping Reviews. In: Aromataris E, Munn Z, eds. *JBI Manual for Evidence Synthesis*, JBI, 2020.2020.
24. Tricco AC, Lillie E, Zarin W, et al. PRISMA Extension for Scoping Reviews (PRISMA-ScR): Checklist and Explanation. *Ann Intern Med*. 2018;169(7):467-473.
25. Veritas Health Innovation. Covidence systematic review software. <https://www.covidence.org/>. Published 2021. Accessed.

1  
2  
3  
4  
5  
6  
7  
8  
9  
10  
11  
12  
13  
14  
15  
16  
17  
18  
19  
20  
21  
22  
23  
24  
25  
26  
27  
28  
29  
30  
31  
32  
33  
34  
35  
36  
37  
38  
39  
40  
41  
42  
43  
44  
45  
46  
47  
48  
49  
50  
51  
52  
53  
54  
55  
56  
57  
58  
59  
60

Figure 1. Scoping Review Procedure

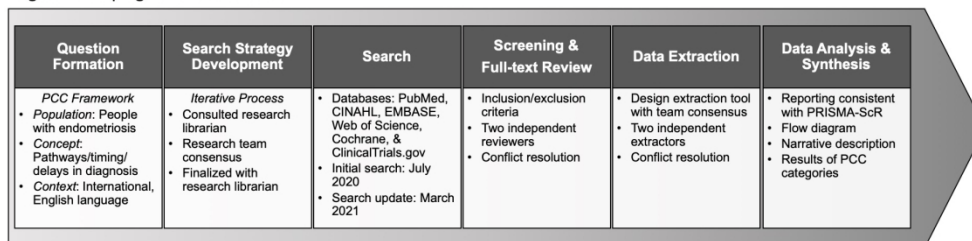

Figure 1. Scoping Review Procedure

338x190mm (144 x 144 DPI)

1  
2  
3  
4  
5  
6  
7  
8  
9  
10  
11  
12  
13  
14  
15  
16  
17  
18  
19  
20  
21  
22  
23  
24  
25  
26  
27  
28  
29  
30  
31  
32  
33  
34  
35  
36  
37  
38  
39  
40  
41  
42  
43  
44  
45  
46  
47  
48  
49  
50  
51  
52  
53  
54  
55  
56  
57  
58  
59  
60

Figure 2. Scoping Review Research Questions

**Primary Review Question**  
What research has been performed internationally (context) concerning the pathways, timing, and delays in diagnosis of endometriosis (concept) for people across all age groups (population)?

**Secondary Review Questions**

- What approaches have researchers utilized to investigate pathways, timing, and delays in diagnosis?
- How have pathways, timing, and delays in diagnosis been defined in research?
- What are ways pathways, timing, and delays in diagnosis have been measured?
- What are the characteristics of the samples studied in this research?
- What factors were investigated or identified in relationship to pathways, timing, and delays in diagnosis?
- What impacts of delays in diagnosis on the participants' lives were investigated or identified?

Figure 2. Scoping Review Research Questions

338x190mm (144 x 144 DPI)

# BMJ Open

## Timing, Delays, and Pathways to Diagnosis of Endometriosis: A Scoping Review Protocol

|                                 |                                                                                                                                                                                                                                                                                                                                                                                                                                                                                                                                                                                                              |
|---------------------------------|--------------------------------------------------------------------------------------------------------------------------------------------------------------------------------------------------------------------------------------------------------------------------------------------------------------------------------------------------------------------------------------------------------------------------------------------------------------------------------------------------------------------------------------------------------------------------------------------------------------|
| Journal:                        | <i>BMJ Open</i>                                                                                                                                                                                                                                                                                                                                                                                                                                                                                                                                                                                              |
| Manuscript ID                   | bmjopen-2021-049390.R1                                                                                                                                                                                                                                                                                                                                                                                                                                                                                                                                                                                       |
| Article Type:                   | Protocol                                                                                                                                                                                                                                                                                                                                                                                                                                                                                                                                                                                                     |
| Date Submitted by the Author:   | 05-Jun-2021                                                                                                                                                                                                                                                                                                                                                                                                                                                                                                                                                                                                  |
| Complete List of Authors:       | Cromeens, Martha Grace; University of North Carolina at Chapel Hill Graduate School, School of Nursing<br>Carey, Erin; University of North Carolina at Chapel Hill School of Medicine, Department of Obstetrics and Gynecology<br>Robinson, W. R.; University of North Carolina at Chapel Hill Gillings School of Global Public Health, Department of Epidemiology; University of North Carolina at Chapel Hill Carolina Population Center<br>Knafel, Kathleen; University of North Carolina at Chapel Hill, School of Nursing<br>Thoyre, SM; University of North Carolina at Chapel Hill, School of Nursing |
| <b>Primary Subject Heading</b>: | Obstetrics and gynaecology                                                                                                                                                                                                                                                                                                                                                                                                                                                                                                                                                                                   |
| Secondary Subject Heading:      | Obstetrics and gynaecology, Nursing, Patient-centred medicine, Research methods                                                                                                                                                                                                                                                                                                                                                                                                                                                                                                                              |
| Keywords:                       | GYNAECOLOGY, International health services < HEALTH SERVICES ADMINISTRATION & MANAGEMENT, Protocols & guidelines < HEALTH SERVICES ADMINISTRATION & MANAGEMENT, REPRODUCTIVE MEDICINE, Minimally invasive surgery < GYNAECOLOGY, Reproductive medicine < GYNAECOLOGY                                                                                                                                                                                                                                                                                                                                         |
|                                 |                                                                                                                                                                                                                                                                                                                                                                                                                                                                                                                                                                                                              |

SCHOLARONE™  
Manuscripts



I, the Submitting Author has the right to grant and does grant on behalf of all authors of the Work (as defined in the below author licence), an exclusive licence and/or a non-exclusive licence for contributions from authors who are: i) UK Crown employees; ii) where BMJ has agreed a CC-BY licence shall apply, and/or iii) in accordance with the terms applicable for US Federal Government officers or employees acting as part of their official duties; on a worldwide, perpetual, irrevocable, royalty-free basis to BMJ Publishing Group Ltd ("BMJ") its licensees and where the relevant Journal is co-owned by BMJ to the co-owners of the Journal, to publish the Work in this journal and any other BMJ products and to exploit all rights, as set out in our [licence](#).

The Submitting Author accepts and understands that any supply made under these terms is made by BMJ to the Submitting Author unless you are acting as an employee on behalf of your employer or a postgraduate student of an affiliated institution which is paying any applicable article publishing charge ("APC") for Open Access articles. Where the Submitting Author wishes to make the Work available on an Open Access basis (and intends to pay the relevant APC), the terms of reuse of such Open Access shall be governed by a Creative Commons licence – details of these licences and which [Creative Commons](#) licence will apply to this Work are set out in our licence referred to above.

Other than as permitted in any relevant BMJ Author's Self Archiving Policies, I confirm this Work has not been accepted for publication elsewhere, is not being considered for publication elsewhere and does not duplicate material already published. I confirm all authors consent to publication of this Work and authorise the granting of this licence.

## Timing, Delays and Pathways to Diagnosis of Endometriosis: A Scoping Review Protocol

Authors: Martha Grace Cromeens, JD, BSN, RN<sup>1</sup>  
Erin T. Carey, MD, MSCR<sup>2</sup>  
Whitney R. Robinson, PhD, MSPH<sup>3,4</sup>  
Kathleen Knafl, PhD, FAAN<sup>1</sup>  
S.M. Thoyre, PhD, RN, FAAN<sup>1</sup>

<sup>1</sup>School of Nursing, University of North Carolina, Chapel Hill, NC, USA

<sup>2</sup>Department of Obstetrics and Gynecology, University of North Carolina, Chapel Hill, NC, USA

<sup>3</sup>Department of Epidemiology, Gillings School of Global Public Health, University of North Carolina at Chapel Hill, Chapel Hill, NC, USA

<sup>4</sup>Carolina Population Center, University of North Carolina, Chapel Hill, NC, USA

Corresponding Author:

Martha Grace Cromeens,  
Carrington Hall, Campus Box #7460,  
Chapel Hill, NC 27599-7460  
cromeens@email.unc.edu

## Abstract

### Introduction

Pathways to diagnosis for women with endometriosis are frequently characterized with delays. Internationally, women face significant barriers and times to diagnosis. The prolonged time without a diagnosis may result in treatment delay, with clinical implications of chronic pain and an unknown effect on fertility outcomes. As delays in diagnosis extend, those suffering from endometriosis incur more cost and frequently experience a reduction in quality of life. The scoping review described in this protocol will (1) map current international scientific peer-reviewed and gray literature investigating pathways, timing, and delay of diagnosis of endometriosis, (2) define common concepts utilized in the literature, and (3) identify gaps for future examination and intervention development.

### Methods & analysis

This protocol outlines a scoping review to investigate the current research focused on pathways, timing and delays in endometriosis diagnosis. The scoping review utilizes the Joanna Briggs Institute Methodology. The researchers applied the Population, Concept, Context (PCC) approach to form the research questions. A search string of key terms and Medical Subject Headings (MeSH) will be used to systematically search the PubMed, CINAHL, EMBASE, Web of Science, and Cochrane databases. We will also search ClinicalTrials.gov and gray literature sources. The original search was performed in July 2020, and it will be rerun prior to manuscript submission. Finally, the reference lists of included works will be reviewed for additional studies. The search results will be screened and reviewed according to predetermined inclusion and exclusion criteria. Data will be extracted from the studies identified for final inclusion using a predetermined tool. The resulting data will be analyzed to report the state of the science.

### Ethics and dissemination

The proposed scoping review does not require review or approval by an ethical board. The researchers will disseminate the study results via conference presentations and publication in a peer-reviewed journal.

### Strengths and limitations of this study

- This protocol proposes a systematic scoping review of current literature and research on the pathways, timing, and delays of the diagnosis of endometriosis.
- The Joanna Briggs Institute Methodology and recommended Population, Concept, Context (PCC) method for research question formation is the scaffold on which this protocol builds a systematic approach.
- This review excludes non-English language studies.
- The proposed scoping review offers an effective and comprehensive means to identify gaps for future research into pathways, timing, and delays of diagnosis of endometriosis.

## Introduction

Endometriosis, a gynecologic condition characterized by endometrial stroma and gland like lesions outside of the uterus, has variable clinical presentations.<sup>1-3</sup> The lesions themselves may be limited to superficial implants, cysts inside the ovary, deep infiltrating disease into the surrounding tissue or pelvic organs or a combination. Similarly, clinical symptoms are also varied, ranging from women who experience no pain, to those with dysmenorrhea, dyspareunia, dyschezia, or those with a complex pelvic pain presentation with multiple pain complaints.<sup>4</sup> Although health care providers make provisional diagnoses based on symptoms, physical exams, imaging, and treatment response, surgical evaluation with adjunct histologic review remains the gold standard of diagnosis.<sup>1,5</sup> The requirement of a surgical diagnosis has been challenged for its limitations and risks.<sup>6</sup> This standard acts as a barrier, compounding obstacles to diagnosis for patients, providers, and health systems. As a result, adults and adolescents with endometriosis internationally experience delays and extended times to diagnosis.

Diagnostic delay may have potentially harmful effects on the central nervous system, as people without a diagnosis may experience more pain over time. Chronic, untreated pain from any cause, including endometriosis, may contribute to dysregulation of the peripheral and central nervous system.<sup>7</sup> Over time, alterations in pain processing, increases the risk of developing abnormal pain referral patterns and may result in a chronic pain presentation.<sup>7-11</sup>

Likewise, the impact of diagnostic delay and infertility should not be overlooked. Endometriosis decreases fertility through several mechanisms including structural abnormalities in reproductive organs, immunologic and endocrine dysfunction affecting embryo implantation, and baseline ovarian reserve.<sup>12</sup> Compared to medical treatment of endometriosis-associated infertility, surgical interventions may have a greater effect on fertility outcomes.<sup>13</sup>



1  
2  
3 In parallel, individuals with endometriosis incur significant costs in the form of lost work  
4 productivity and healthcare expenses. Prolonging the search for a diagnosis and delaying treatment  
5 may mean extended times of compounding financial losses. Multiple studies have found that  
6 symptomatic individuals report lost work productivity (absenteeism and presenteeism), being out of  
7 work up to ten or more hours per week.<sup>14-16</sup> Further, people with endometriosis incur significant  
8 costs, both direct (e.g., emergency department visits, hospitalizations, surgeries and treatments)<sup>17-19</sup>  
9 and indirect (e.g., work absenteeism, short- and long-term disability).<sup>14,16-19</sup> Soliman et al found that  
10 patients with endometriosis had significantly higher healthcare utilization and higher annual all-cause  
11 expenditures pre- and post-diagnosis compared to control patients.<sup>18</sup> These financial burdens likely  
12 mount as they seek a diagnosis.  
13  
14  
15  
16  
17  
18  
19  
20  
21  
22  
23  
24

25  
26 Despite what is known about the physical and financial burdens of endometriosis, the  
27 systematic reviews on timing, delay, and influencing factors on pathways to diagnosis are limited. In  
28 2013, Culley et al. published a critical narrative review of studies reporting the psychological impact  
29 of endometriosis.<sup>20</sup> The twenty-one studies, categorized by patient related factors and medical  
30 profession related factors, found diagnostic delay to be a key theme.<sup>20</sup> This review, while helpful,  
31 only captured studies focused on psychological impacts of endometriosis. Two years later, a  
32 systematic review of qualitative research on women's experiences with endometriosis was  
33 published.<sup>21</sup> Again, diagnostic delay was a major theme in 10 of the 18 studies reviewed.<sup>21</sup> While the  
34 review outlined major findings concerning delays, it did not elaborate on the concept of diagnosis  
35 delay. Furthermore, this review solely considered qualitative studies, limiting the overall research  
36 landscape of diagnosis delay data.<sup>21</sup> In 2017, Soliman, Fuldeore, and Snabes conducted a quantitative  
37 study analyzing factors associated with the time to diagnosis including a supplemental table of 16  
38 studies reporting diagnostic delays.<sup>22</sup> No further analysis of the concepts or literature were  
39 presented. In April 2020, a systematic review of diagnostic delay for women with endometriosis  
40  
41  
42  
43  
44  
45  
46  
47  
48  
49  
50  
51  
52  
53  
54  
55  
56  
57  
58  
59  
60

1  
2  
3 using quantitative data to review duration of diagnostic delay was registered with PROSPERO.<sup>23</sup> To  
4 the knowledge of the authors of this protocol, the registered review has not been published. These  
5 studies highlight a growing interest regarding factors associated with diagnostic delay of  
6 endometriosis.  
7  
8  
9  
10

11 While these resources represent the reviews and summaries of studies on timing, delay, or  
12 pathways to diagnosis of endometriosis, there is no systematic scoping review of the qualitative and  
13 quantitative available literature on these topics. A systematic scoping review is well suited for the  
14 broad objectives of this study, designed to map concepts and identify knowledge gaps.<sup>24</sup> A scoping  
15 review methodology is ideal in searching across research designs (e.g., quantitative, qualitative,  
16 mixed-methods) to determine the range of evidence in a single frame.<sup>24</sup> Scoping reviews do not  
17 analyze nor compare data to make recommendations for clinical practice.<sup>24,25</sup> Instead, scoping  
18 reviews map the existing broad scientific research to identify gaps in research and create  
19 recommendations for future investigation.<sup>24</sup>  
20  
21  
22  
23  
24  
25  
26  
27  
28  
29  
30  
31

32 The information assembled from the scoping review will support the development of a  
33 uniform language and identify necessary directions for future endometriosis research and  
34 interventions. This protocol proposes a systematic scoping review to map the state of the  
35 international scientific research on pathways, timing, and delays of diagnosis of endometriosis to  
36 identify gaps for future investigation across methodologies.  
37  
38  
39  
40  
41  
42  
43

#### 44 **Rationale**

45 Delays in diagnosis for women with endometriosis may result in compounding financial,  
46 emotional, and physical burdens for the women and their communities. Although a recognized  
47 problem internationally, there have been no scoping reviews detailing how this phenomenon has  
48 been studied. A scoping review of the pathways, timing, and delays in diagnosis of endometriosis  
49 will map the existing research, define key concepts, and identify gaps for future research.  
50  
51  
52  
53  
54  
55  
56  
57  
58  
59  
60

## Objectives

The authors describe a protocol for a systematic scoping review with the primary objective to map current international scientific peer-reviewed and gray literature investigating pathways, timing, and delay of diagnosis of endometriosis. The results of this review will guide recommendations for future research.

## Methods and Analysis

This review will follow the Joanna Briggs Institute (JBI) guidelines for scoping reviews.<sup>24,25</sup>

Accordingly, an *a priori* scoping review protocol was developed prior to execution.<sup>24,25</sup> Results of the scoping review will be reported consistent with the Scoping review extension of the Preferred Reporting Items for Systematic Reviews (PRISMA-ScR) checklist.<sup>26</sup> An overview of the procedure discussed in the protocol is presented in Figure 1.

## Patient and Public Involvement

This scoping review will not require patient or public involvement. Patients and the public were not involved in the design, or conduct, or reporting, or dissemination plans of this protocol.

## Scoping review questions

The research questions for this scoping review were formed by applying the Population—Concept—Context (PCC) framework (see Table 1) to achieve the primary objective described above.<sup>24</sup>

**Table 1**

*Population—Concept—Context*

|            |                                                                                                                                                                                                                                                                                                                                                                                           |
|------------|-------------------------------------------------------------------------------------------------------------------------------------------------------------------------------------------------------------------------------------------------------------------------------------------------------------------------------------------------------------------------------------------|
| Population | All peer-reviewed and gray literature including people with endometriosis across all age groups.                                                                                                                                                                                                                                                                                          |
| Concepts   | Literature reporting research on pathways, timing, or delay in diagnosis of endometriosis will be included in the review. The concept of “pathways” includes research on influencing factors leading to a diagnosis such as the first provider consulted, specialty of providers, numbers of providers, and numbers of emergency room visits as they relate to timing/delay of diagnosis. |
| Context    | The context is international. The location, time frame, and environment will not be limited. The language of the articles was limited to English.                                                                                                                                                                                                                                         |

1  
2  
3  
4  
5 This led to the primary question: What research has been performed internationally (context)  
6 concerning the pathways, timing, and delays in diagnosis of endometriosis (concept) for people  
7  
8 across all age groups (population)? Secondary review questions were identified to further  
9  
10 understanding of the defined PCC and answer the primary question. The primary and secondary  
11  
12 review questions can be seen in Figure 2.  
13  
14  
15

### 16 **Search strategy process**

17  
18 The search strategy will utilize the three-step process recommended by JBI.<sup>24</sup> First, we compiled a  
19  
20 list of potential search terms by reviewing titles, abstracts, and index terms of key articles found in  
21  
22 PubMed and CINAHL. The information gained from the initial search was used to develop a more  
23  
24 comprehensive search strategy based on the PCC framework. The list of root terms and the  
25  
26 PubMed search string can be seen in Table 2. Variants of the terms identified in Table 2 were  
27  
28 refined to create a final search strategy with search phrases and MeSH terms. A research librarian  
29  
30 was consulted in the development of the final search strategy. The term “pathway” and its variants  
31  
32 were excluded from the search string because they drew results focused on genetic testing. However,  
33  
34 studies focused on pathways to diagnosis in relationship to timing or delay were captured using the  
35  
36 terms in Table 2. Gray literature such as dissertations and white papers were not filtered out of the  
37  
38 search string. The search strategy would capture these materials in the respective databases. Second,  
39  
40 the search strategy was reviewed by the team members and then translated for each database being  
41  
42 searched. The finalized search strings were used to search six databases (see below). Third, the  
43  
44 reference lists of the included articles (determined in the screening process discussed below) were  
45  
46 searched for additional studies with the key terms in mind.  
47  
48  
49  
50  
51  
52

53 **Table 2**

54 *Search terms*

| 55 Search terms | 56 MeSH terms |
|-----------------|---------------|
|-----------------|---------------|

| <ul style="list-style-type: none"> <li>• Diagnosis</li> <li>• Delayed diagnosis</li> <li>• Late diagnosis</li> <li>• Time</li> <li>• Delay</li> <li>• Endometriosis</li> </ul>                                                                                                                                                                                                                                                                   | <ul style="list-style-type: none"> <li>• Delayed Diagnosis</li> <li>• Time factors</li> <li>• Endometriosis</li> </ul> |
|--------------------------------------------------------------------------------------------------------------------------------------------------------------------------------------------------------------------------------------------------------------------------------------------------------------------------------------------------------------------------------------------------------------------------------------------------|------------------------------------------------------------------------------------------------------------------------|
| PubMed Search String                                                                                                                                                                                                                                                                                                                                                                                                                             |                                                                                                                        |
| <pre>((("Delayed Diagnosis"[Mesh] OR "Delayed Diagnosis"[tiab] OR "Delayed Diagnoses"[tiab] OR "Late Diagnosis"[tiab] OR "late diagnoses"[tiab] OR ((diagnosis[sh] OR diagnosis[tiab] OR diagnosed[tiab] OR diagnosing[tiab] OR diagnoses[tiab]) AND ("time factors"[mesh] OR delay[tiab] OR delayed[tiab] OR delays[tiab] OR delaying[tiab]))) AND ((endometriosis[mesh] OR endometriosis[tiab] OR Endometrioses[tiab])) Filters: English</pre> |                                                                                                                        |

### Information sources

Five databases—PubMed, CINAHL, EMBASE, Web of Science, and Cochrane—were searched on 1 July 2020. The search did not apply date limits, but excluded non-English language articles. We also searched ClinicalTrials.gov for registered clinical studies focused on pathways, timing, or delays in diagnosis of endometriosis. The search will be repeated prior to the submission of the scoping review results for publication (expected in September 2021).

### Eligibility criteria

The eligibility criteria were built on the PCC framework to answer the research questions. The inclusion and exclusion criteria are outlined in Table 3.

**Table 3**

*Inclusion and Exclusion criteria*

| Inclusion criteria                                                                                                                                                                                                                                                                                                     | Exclusion criteria                                                                                                                                                                                                                                                                                                                                                      |
|------------------------------------------------------------------------------------------------------------------------------------------------------------------------------------------------------------------------------------------------------------------------------------------------------------------------|-------------------------------------------------------------------------------------------------------------------------------------------------------------------------------------------------------------------------------------------------------------------------------------------------------------------------------------------------------------------------|
| <ul style="list-style-type: none"> <li>• Studies with participants of any age, race/ethnicity, nationality, or socioeconomic status</li> <li>• Study participants identified as having endometriosis (i.e., surgical verification, histological confirmation, provider presumed, or participant identified)</li> </ul> | <ul style="list-style-type: none"> <li>• Animal studies</li> <li>• Abstracts only</li> <li>• Editorials, Op-eds, or position papers</li> <li>• Literature reviews</li> <li>• Case reports</li> <li>• Pathways, timing, or delays in diagnosis are reported solely as a descriptive statistic of the sample.</li> <li>• Full-text is not published in English</li> </ul> |

|                                                                                                                                                                                                                                                                                                                                                                                             |                                                                                                                                                                                                                                                                                     |
|---------------------------------------------------------------------------------------------------------------------------------------------------------------------------------------------------------------------------------------------------------------------------------------------------------------------------------------------------------------------------------------------|-------------------------------------------------------------------------------------------------------------------------------------------------------------------------------------------------------------------------------------------------------------------------------------|
| <ul style="list-style-type: none"> <li>• The purpose and/or results of the study report issues related to pathways, timing, and/or delay in diagnosis</li> <li>• Primary research/empirical studies (qualitative, quantitative, mixed-methods, and intervention studies)</li> <li>• Peer-reviewed journals</li> <li>• Gray sources (e.g., dissertations)</li> <li>• Case studies</li> </ul> | <ul style="list-style-type: none"> <li>• Studies concentrating on diagnostic tools, tests, or equipment.</li> <li>• Studies in which the participants are solely healthcare providers and focus on knowledge base, understanding, and opinions concerning endometriosis.</li> </ul> |
|---------------------------------------------------------------------------------------------------------------------------------------------------------------------------------------------------------------------------------------------------------------------------------------------------------------------------------------------------------------------------------------------|-------------------------------------------------------------------------------------------------------------------------------------------------------------------------------------------------------------------------------------------------------------------------------------|

### Abstract and full-text screening

The literature search from all included databases will be uploaded to Endnote, where duplicates will be removed. The remaining results will be imported into Covidence<sup>27</sup> for the screening process. Covidence also removes duplicates. For the initial screening, two researchers will independently review the titles and abstracts for inclusion. The two screeners will perform the initial screening for 10% of the records by applying the inclusion and exclusion criteria. Following the screening, they will review conflicting decisions to develop a common understanding of the inclusion/exclusion criteria and improve agreement. Revisions may be made to the inclusion and exclusion criteria through this process. After reviewing 50% of the cases, a second meeting will be scheduled to resolve conflicts, then proceed with the remaining records. Finally, a third researcher will independently “tie-break” any unresolved conflicts.

After completion of the record review, the same two screeners will perform the full-text screening of the records that passed the initial abstract screening. Again, the two screeners will review 10% of the articles for inclusion, and then meet to resolve conflicts and refine their application of the inclusion/exclusion criteria. In cases of record disagreement, a third researcher will resolve conflicts. The same process will repeat for the first 50% of the records, and again for the final 50% of the cases. The cases that make it through the full-text review will comprise the sample for data extraction and references from included articles will be reviewed to identify additional

potential articles and gray literature (e.g., dissertations, white papers). If any materials are chosen from the reference lists, they will be added to Covidence and they will undergo the process of abstract and full-text screening.

### Data extraction and charting

A preliminary data extraction tool was created based on the objective, PCC framework, and resulting research questions. Four researchers will perform an initial review of articles. As a group, they will edit and refine the initial extraction tool to better meet the study objective and review questions.<sup>25</sup> The data extraction fields will be chosen to further explore population, concept, and context. Possible data extraction categories for each can be seen in Table 4. The final sample of articles will be divided equally among the reviewers, with two researchers reviewing each article: the primary author and an additional reviewer. The extraction tool will be used to collect and chart data. The two reviewers will meet to resolve conflicts, hone their shared understanding of the extraction method, and refine the extraction tool when needed. A third researcher will resolve unreconciled conflicts.

**Table 4**

*Extraction categories*

| Population                                                                                                                                                                                                                                                          | Concept                                                                                                                                                                                                                                                               | Context                                                                                                                                                                                                        |
|---------------------------------------------------------------------------------------------------------------------------------------------------------------------------------------------------------------------------------------------------------------------|-----------------------------------------------------------------------------------------------------------------------------------------------------------------------------------------------------------------------------------------------------------------------|----------------------------------------------------------------------------------------------------------------------------------------------------------------------------------------------------------------|
| <ul style="list-style-type: none"> <li>• Sample size</li> <li>• Means of diagnosis of endometriosis</li> <li>• Race/ethnicity</li> <li>• Socioeconomic status (proxies reported)</li> <li>• Demographics reported</li> <li>• Health descriptors reported</li> </ul> | <ul style="list-style-type: none"> <li>• Definition of pathway, timing, or delay</li> <li>• Means of calculation</li> <li>• Factors investigated in relationship to pathway, timing, or delay</li> <li>• Impacts of delay and diagnosis on patients' lives</li> </ul> | <ul style="list-style-type: none"> <li>• Geographic origin of study</li> <li>• Recruitment setting</li> <li>• Recruitment means</li> <li>• Data collection setting</li> <li>• Data collection means</li> </ul> |

### Data analysis and synthesis of results

The results of the search strategy and the screening process will be reported consistent with the PRISMA-ScR recommended method with a flow diagram and corresponding narrative

1  
2  
3 description.<sup>26</sup> The researchers will report the synthesis of the data from the extraction tool for the  
4 PCC categories (Table 4). The results will be reported to answer the primary objective and research  
5 questions (Figure 2).  
6  
7  
8

## 9 **Discussion (Ethics and Dissemination)**

10  
11 Approval from the research ethics boards of the University of North Carolina at Chapel Hill  
12 is not required for this scoping review. The scoping review did not require patient or public  
13 involvement, limiting ethical and safety considerations. The results of this scoping review will be  
14 disseminated through academic, clinical, and public venues. The researchers will seek publication for  
15 the results in peer-reviewed journals, and present the review findings at conferences. The researchers  
16 also intend to form recommendations for areas of future research.  
17  
18  
19  
20  
21  
22  
23  
24

25 One limitation of this review is the language restriction. The researchers limited inclusion to  
26 articles published in English. Articles that had an English abstract, but non-English body were  
27 excluded. Endometriosis and delays in diagnosis of endometriosis are challenges experienced and  
28 researched globally. The science would benefit from a scoping review inclusive of other languages.  
29  
30  
31  
32  
33

34 The common phenomenon of prolonged average times to diagnosis represents one of the  
35 most challenging aspects of endometriosis for the patients and their healthcare providers. The  
36 scoping review of delay, timing, and pathways to diagnosis described in this protocol will survey the  
37 current scientific literature to identify gaps in the research across methods to encourage uniformity  
38 of terms and prevent duplication of efforts. International consensus on definitions and concepts  
39 while recognizing past research approaches to understand influencing factors, relationships, and  
40 impacts of delays in diagnosis of endometriosis will lead to more efficient research, targeted  
41 interventions, and ultimately improved outcomes for patients.  
42  
43  
44  
45  
46  
47  
48  
49  
50  
51

## 52 **Figure legend**

53  
54  
55 Figure 1. Scoping Review Procedure  
56  
57  
58  
59  
60



1  
2  
3 Figure 2. Scoping Review Research Questions  
4

5 **Authors' contributions:**  
6

7 All five authors contributed to the design, search strategy, and writing of the scoping review  
8 protocol.  
9

10 MGC, ETC, WRR, KK, SMT: Made substantial contributions to conception and design, or  
11 acquisition of data, or analysis and interpretation of data.  
12

13 MGC, ETC, WRR, KK, SMT: Involved in drafting the manuscript or revising it critically for  
14 important intellectual content.  
15

16 MGC, ETC, WRR, KK, SMT: Given final approval of the version to be published. Each author  
17 should have participated sufficiently in the work to take public responsibility for appropriate  
18 portions  
19 of the content.  
20

21 MGC, ETC, WRR, KK, SMT: Agreed to be accountable for all aspects of the work in ensuring that  
22 questions related to the accuracy or integrity of any part of the work are appropriately investigated  
23 and resolved.  
24  
25  
26  
27  
28  
29

30 **Competing interests statement**  
31

32 The authors have no competing interests to declare.  
33  
34  
35  
36

37 **Funding Statement:**  
38

39 Funding Statement: This research is supported by the National Institute of Nursing Research of the  
40 National Institutes of Health under award number F31NR018786 (Cromeens, PI), a UNC  
41 Dissertation Completion Fellowship, and a 2018 Sigma Small Grant by Sigma Theta Tau  
42 International (STTI #19-2191). Ms. Cromeens is also a Virginia Kelley Scholar of the American  
43 Nurses Foundation (ANF 10055), a Linda Waring Matthews Research Scholar, 2019-2020, and a  
44 Hillman Scholar in Nursing Innovation at the School of Nursing at the University of North Carolina  
45  
46  
47  
48  
49  
50  
51  
52  
53  
54  
55  
56  
57  
58  
59  
60

1  
2  
3 at Chapel Hill. This study also received funding from the Hillman Scholars Program in Nursing  
4  
5 Innovation through the “Interdisciplinary Inquiry” and the “Advancing Early Research  
6  
7 Opportunities” grants. Dr. Robinson’s research, “Racial differences in treatment with hysterectomy:  
8  
9 A multilevel investigation,” is supported by the National Institute on Minority Health and Health  
10  
11 Disparities of the National Institutes of Health under award number R01MD011680 (Robinson, PI).  
12  
13  
14  
15  
16  
17  
18  
19  
20  
21  
22  
23  
24  
25  
26  
27  
28  
29  
30  
31  
32  
33  
34  
35  
36  
37  
38  
39  
40  
41  
42  
43  
44  
45  
46  
47  
48  
49  
50  
51  
52  
53  
54  
55  
56  
57  
58  
59  
60

## References

1. Giudice LC, Kao LC. Endometriosis. *Lancet (London, England)*. 2004;364(9447):1789-1799.
2. Zondervan KT, Becker CM, Missmer SA. Endometriosis. *N Engl J Med*. 2020;382(13):1244-1256.
3. Zondervan KT, Becker CM, Koga K, Missmer SA, Taylor RN, Viganò P. Endometriosis. *Nat Rev Dis Primers*. 2018;4(1):9.
4. Vercellini P, Viganò P, Somigliana E, Fedele L. Endometriosis: pathogenesis and treatment. *Nature Reviews Endocrinology*. 2014;10(5):261-275.
5. Kinkel K, Brosens J, Brosens I. Preoperative Investigations. In: Sutton C, Jones K, Adamson GD, eds. *Modern Management of Endometriosis*. London, England: Taylor and Francis Group; 2006:71-85.
6. Agarwal SK, Chapron C, Giudice LC, et al. Clinical diagnosis of endometriosis: a call to action. *American journal of obstetrics and gynecology*. 2019;220(4):354.e351-354.e312.
7. Stratton P, Berkley KJ. Chronic pelvic pain and endometriosis: translational evidence of the relationship and implications. *Human reproduction update*. 2011;17(3):327-346.
8. Aredo JV, Heyrana KJ, Karp BI, Shah JP, Stratton P. Relating Chronic Pelvic Pain and Endometriosis to Signs of Sensitization and Myofascial Pain and Dysfunction. *Seminars in reproductive medicine*. 2017;35(1):88-97.
9. Bajaj P, Bajaj P, Madsen H, Arendt-Nielsen L. Endometriosis is associated with central sensitization: a psychophysical controlled study. *The journal of pain : official journal of the American Pain Society*. 2003;4(7):372-380.
10. Vuontisjarvi S, Rossi HR, Herrala S, et al. The Long-Term Footprint of Endometriosis: Population-Based Cohort Analysis Reveals Increased Pain Symptoms and Decreased Pain

- 1  
2  
3 Tolerance at Age 46 Years. *The journal of pain : official journal of the American Pain Society*.  
4  
5 2018;19(7):754-763.  
6  
7  
8 11. Morotti M, Vincent K, Becker CM. Mechanisms of pain in endometriosis. *European journal of*  
9  
10 *obstetrics, gynecology, and reproductive biology*. 2017;209:8-13.  
11  
12 12. Practice Committee of the American Society for Reproductive Medicine. Endometriosis and  
13  
14 infertility: a committee opinion. *Fertility and sterility*. 2012;98(3):591-598.  
15  
16 13. Lee D, Kim SK, Lee JR, Jee BC. Management of endometriosis-related infertility:  
17  
18 Considerations and treatment options. *Clin Exp Reprod Med*. 2020;47(1):1-11.  
19  
20 14. Fourquet J, Baez L, Figueroa M, Iriarte RI, Flores I. Quantification of the impact of  
21  
22 endometriosis symptoms on health-related quality of life and work productivity. *Fertility and*  
23  
24 *sterility*. 2011;96(1):107-112.  
25  
26 15. Nnoaham KE, Hummelshoj L, Webster P, et al. Impact of endometriosis on quality of life  
27  
28 and work productivity: a multicenter study across ten countries. *Fertility and sterility*.  
29  
30 2011;96(2):366-373.e368.  
31  
32 16. Soliman AM, Coyne KS, Gries KS, Castelli-Haley J, Snabes MC, Surrey ES. The Effect of  
33  
34 Endometriosis Symptoms on Absenteeism and Presenteeism in the Workplace and at Home.  
35  
36 *Journal of managed care & specialty pharmacy*. 2017;23(7):745-754.  
37  
38 17. Gao X, Outley J, Botteman M, Spalding J, Simon JA, Pashos CL. Economic burden of  
39  
40 endometriosis. *Fertility and sterility*. 2006;86(6):1561-1572.  
41  
42 18. Soliman AM, Surrey E, Bonafede M, Nelson JK, Castelli-Haley J. Real-World Evaluation of  
43  
44 Direct and Indirect Economic Burden Among Endometriosis Patients in the United States.  
45  
46 *Advances in therapy*. 2018;35(3):408-423.  
47  
48  
49  
50  
51  
52  
53  
54  
55  
56  
57  
58  
59  
60

- 1  
2  
3 19. Soliman AM, Taylor HS, Bonafede M, Nelson JK, Castelli-Haley J. Incremental direct and  
4 indirect cost burden attributed to endometriosis surgeries in the United States. *Fertility and*  
5  
6 *sterility*. 2017;107(5):1181-1190.e1182.  
7  
8  
9  
10 20. Culley L, Law C, Hudson N, et al. The social and psychological impact of endometriosis on  
11 women's lives: a critical narrative review. *Human reproduction update*. 2013;19(6):625-639.  
12  
13  
14 21. Young K, Fisher J, Kirkman M. Women's experiences of endometriosis: a systematic review  
15 and synthesis of qualitative research. *The journal of family planning and reproductive health care*.  
16  
17 2015;41(3):225-234.  
18  
19  
20 22. Soliman AM, Fuldeore M, Snabes MC. Factors Associated with Time to Endometriosis  
21 Diagnosis in the United States. *Journal of women's health (2002)*. 2017;26(7):788-797.  
22  
23  
24 23. Illum LRH, Rytter D, Forman A, Ostergaard LH, Melgaard A, de Thurah A. A systematic  
25 review of the diagnostic delay for women with endometriosis. In. PROSPERO 2020  
26  
27 CRD420201602242020.  
28  
29  
30 24. Peters MD, Godfrey CM, Khalil H, McInerney P, Parker D, Soares CB. Guidance for  
31 conducting systematic scoping reviews. *Int J Evid Based Healthc*. 2015;13(3):141-146.  
32  
33  
34 25. Peters MDJ, Godfrey CM, McInerney P, Munn Z, Tricco AC, Khalil H. Chapter 11: Scoping  
35 Reviews. In: Aromataris E, Munn Z, eds. *JBIManual for Evidence Synthesis, JBI, 2020*.2020.  
36  
37  
38 26. Tricco AC, Lillie E, Zarin W, et al. PRISMA Extension for Scoping Reviews (PRISMA-ScR):  
39 Checklist and Explanation. *Ann Intern Med*. 2018;169(7):467-473.  
40  
41  
42  
43  
44 27. Veritas Health Innovation. Covidence systematic review software.  
45  
46  
47 <https://www.covidence.org/>. Published 2021. Accessed.

1  
2  
3  
4  
5  
6  
7  
8  
9  
10  
11  
12  
13  
14  
15  
16  
17  
18  
19  
20  
21  
22  
23  
24  
25  
26  
27  
28  
29  
30  
31  
32  
33  
34  
35  
36  
37  
38  
39  
40  
41  
42  
43  
44  
45  
46  
47  
48  
49  
50  
51  
52  
53  
54  
55  
56  
57  
58  
59  
60

Figure 1. Scoping Review Procedure

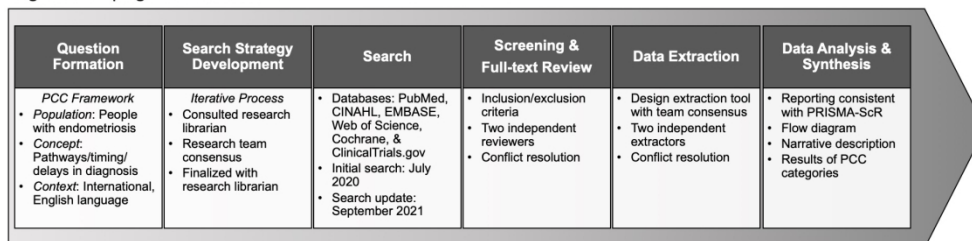

Figure 1. Scoping Review Procedure

338x190mm (144 x 144 DPI)

1  
2  
3  
4  
5  
6  
7  
8  
9  
10  
11  
12  
13  
14  
15  
16  
17  
18  
19  
20  
21  
22  
23  
24  
25  
26  
27  
28  
29  
30  
31  
32  
33  
34  
35  
36  
37  
38  
39  
40  
41  
42  
43  
44  
45  
46  
47  
48  
49  
50  
51  
52  
53  
54  
55  
56  
57  
58  
59  
60

Figure 2. Scoping Review Research Questions

**Primary Review Question**  
What research has been performed internationally (context) concerning the pathways, timing, and delays in diagnosis of endometriosis (concept) for people across all age groups (population)?

**Secondary Review Questions**

- What approaches have researchers utilized to investigate pathways, timing, and delays in diagnosis?
- How have pathways, timing, and delays in diagnosis been defined in research?
- How have the concepts of pathways, timing, and delays in diagnosis been measured?
- What are the characteristics of the samples studied in this research?
- What factors were investigated or identified in relationship to pathways, timing, and delays in diagnosis?
- What impacts of delays in diagnosis were identified or investigated?

Figure 2. Scoping Review Research Questions

338x190mm (144 x 144 DPI)
